# Supplementary material for: A simple approach to spherical nickel-carbon monoliths as light-weight microwave absorbers
Source: Royal Society of Chemistry journal article supplement (doi:10.1039/c2jm32853d), 2012-01-01

## **Supplementary Information**

### **A simple approach to spherical carbon-nickel monolith as light-weight microwave absorbers**

Na Li, Minhua Cao\*, Changwen Hu

Key Laboratory of Cluster Science, Ministry of Education of China, Department of  
Chemistry, Beijing Institute of Technology, Beijing 100081, P. R. China.

**Fig. S1** SEM images of the grounded Ni-C monolith after annealing.

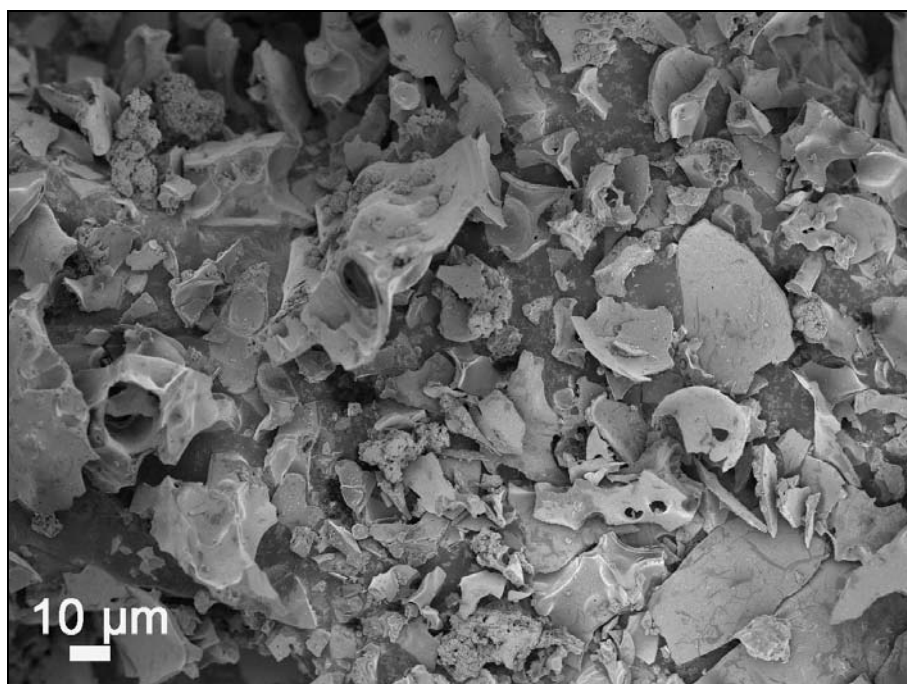

**Table S1** C, N, H and O content (wt.%) of the three samples.

|            | C(%)  | N(%)  | H(%) | O(%)  |
|------------|-------|-------|------|-------|
| Ni-C-11.9% | 47.73 | 14.05 | 1.82 | 24.50 |
| Ni-C-18.2% | 42.75 | 13.96 | 1.87 | 23.22 |
| Ni-C-29.8% | 36.52 | 13.27 | 1.91 | 18.50 |

**Fig. S2** (a) XRD patterns of the Ni-C nanocomposites annealed at 400 °C and 500 °C (b) Microwave reflection losses of the Ni-C nanocomposites annealed at 500 °C.

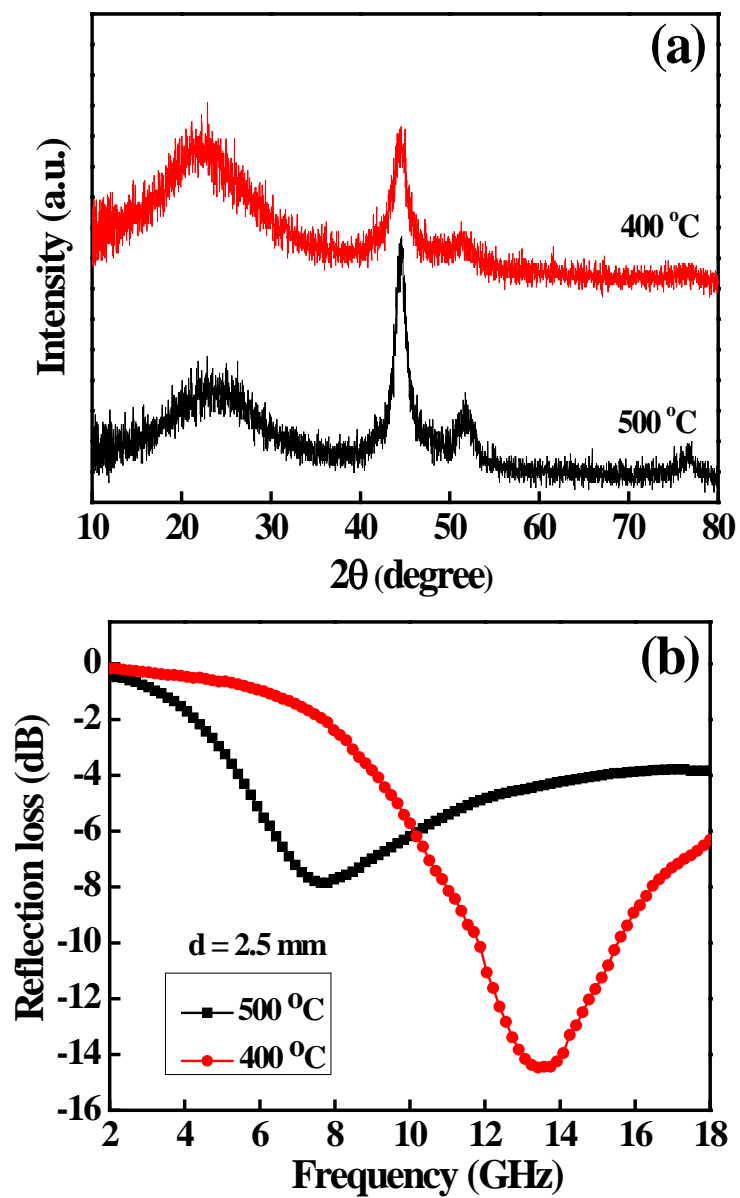

Supplement: c2jm32853d.pdf [file c2jm32853d.pdf]
